# Supplementary material for: Transcriptomic Analysis of Trichoderma atroviride Overgrowing Plant-Wilting Verticillium dahliae Reveals the Role of a New M14 Metallocarboxypeptidase CPA1 in Biocontrol
Source: PubMed Central journal article supplement (PMC6545926; doi:10.3389/fmicb.2019.01120), 2019-05-27
Supplement: Data_Sheet_1.pdf [file Data_Sheet_1.pdf]

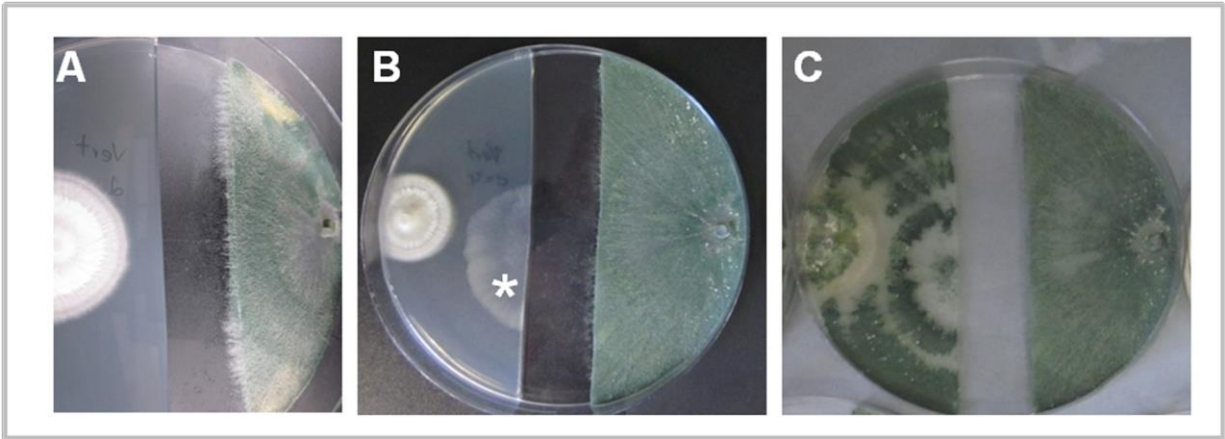

**Figure S1.** *Trichoderma atroviride* T11 biocontrol profile against *Verticillium dahliae* V-138I on discontinuous agar cultures. (A) 7-day colony of T11 confronted with V-138I that was inoculated 4 days in advance. (B) 12-day colony of T11 confronted with V-138I where T11 mycelium has already jumped into the left half of the agar plate (\*). (C) 24-day colony of T11 overgrowing V-138I. Both fungi were inoculated on PDA plates and inoculated at the same time in B and C photos. V-138I was placed on the left and T11 was placed on the right of the images.

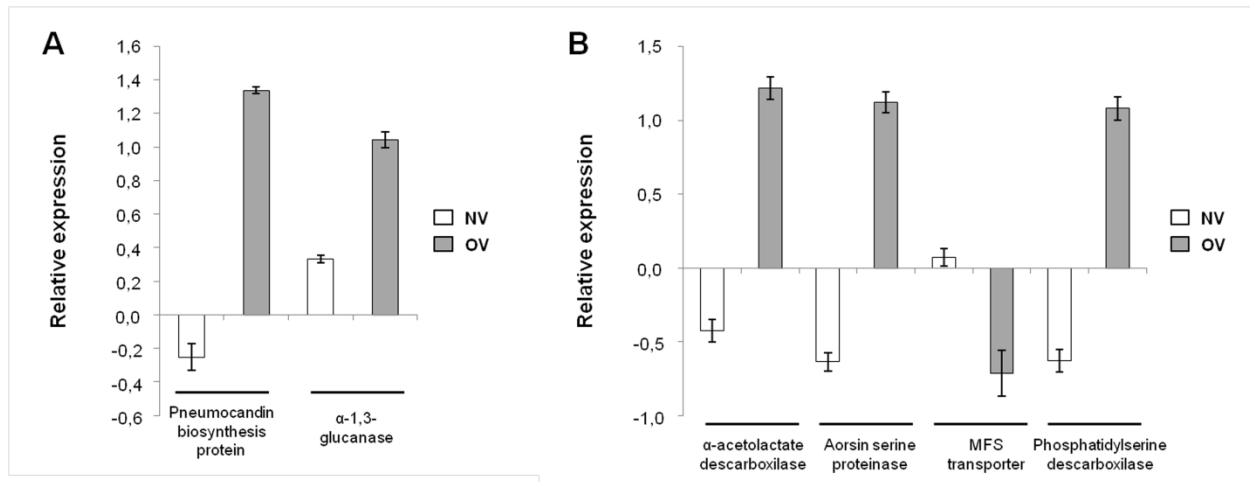

**Figure S2.** RTqPCR expression analysis of six JGI-referred genes *Trichoderma atroviride* T11 used to validate the microarray data. **(A)** Validation of 2 out of the 18 genes differently expressed when comparing T11 overgrowing *Verticillium dahliae* V-138I (OV) with T11 grown alone (CON). Ct values were referred to the CON condition as a basal reference. **(B)** Validation of 6 out of the 18 genes differently expressed when comparing T11 overgrowing V-138I (OV) with T11 grown at 5 mm from V-138I (NV). Ct values were referred to the NV condition as a basal reference. Genes IDs are assigned according JGI annotation as follows: pneumocandin biosynthesis protein (51260), α-1,3-gluconase (81097), α-acetolactate decarboxylase (48180), aorsin serine proteinase (145909), MFS transporter protein (41962) and phosphatidylserine decarboxylase (146755). Data are the mean of three biological replicates and are displayed as the log<sub>10</sub> of the relative quantity (RQ,  $2^{-\Delta\Delta C_t}$ ) of target genes compared with the quantity of actin gene used as a reference.

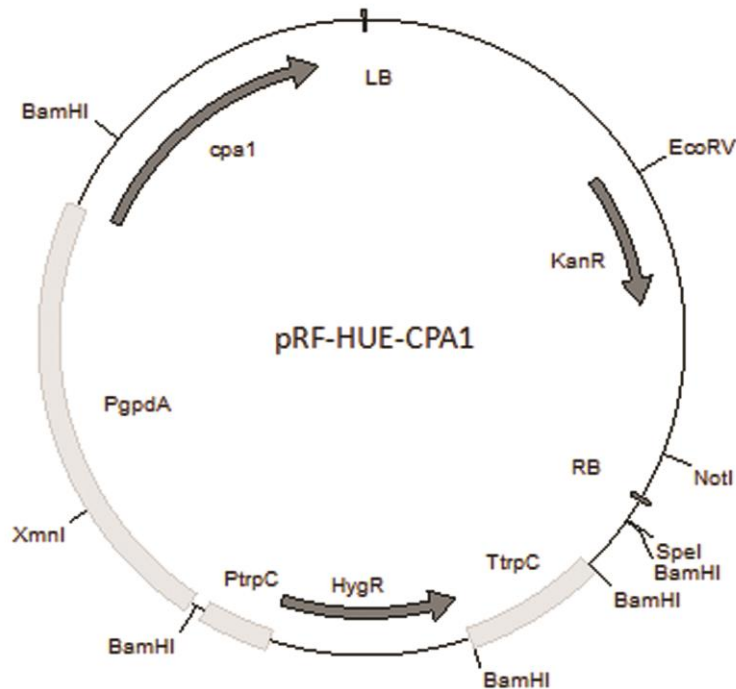

**Figure S3.** pRF-HUE-CPA1 expression vector for T11 transformation. The pRF-HUE vector-backbone was used for a single cloning step of the *cpa1* gene by the USER<sup>TM</sup> technology (Frandsen *et al.*, 2008). LB = left border, *cpa1* = *cpa1* gene from *Trichoderma atroviride* T11, PgpdA = glyceraldehyde-3-phosphate dehydrogenase promoter from *A. nidulans*, PtpC = tryptophan promoter from *A. nidulans*, HygR = hygromycin B phosphotransferase, TtrpC = tryptophan terminator from *A. nidulans*, RB = right border, KanR = kanamycin resistance.
