# Supplementary material for: Transcriptomic Analysis of Trichoderma atroviride Overgrowing Plant-Wilting Verticillium dahliae Reveals the Role of a New M14 Metallocarboxypeptidase CPA1 in Biocontrol
Source: PubMed Central journal article supplement (PMC6545926; doi:10.3389/fmicb.2019.01120), 2019-05-27
Supplement: Data_Sheet_2.pdf [file Data_Sheet_2.pdf]

**TABLE S1.** Specific primer pairs used in RTqPCR analysis

| Putative function                    | JGI ID | Forward (5'-3')           | Reverse (5'-3')          | Slope | Efficiency (%) |
|--------------------------------------|--------|---------------------------|--------------------------|-------|----------------|
| Exo- $\beta$ -1,3-glucanase          | 48371  | ACCAACGATGGTGATGGTCTT     | GGTTGCCAGTGCTGGAGATG     | -3.24 | 103.6          |
| Chitinase                            | 52592  | ATTCAGCACCCCTCAGTCCTGTGGC | GCTGGCAATCAAACCTGTGGTTCA | -3.72 | 85.7           |
| GTP-binding protein                  | 224184 | CATTTCTCTTCTCCCGTTTGTGGC  | GGTCAGAGTTGGCGAGGTGCT    | -3.86 | 81.7           |
| Oligopeptide transporter             | 232557 | CTTCGCCTGGATGACGTGGAT     | GCGGGAGGGAGTAGGTGG       | -3.35 | 98.7           |
| Acyl-CoA thioesterase 2              | 282317 | CTTTCGAGGGAGATAACGACTG    | GGGATTAAGGACAGACACGG     | -3.22 | 104.3          |
| Metalloproteinase                    | 179435 | TGGCGATTATATTGCAGATACTCC  | TAAATTCAGACCAGCAGCCCT    | -3.31 | 100.7          |
| Cytochrome P450 monooxygenase        | 295844 | AATGCGCTCTACGATGTTTATGG   | CATGTTGCACCTTGTTACTGAG   | -3.36 | 98.5           |
| Alkaline proteinase                  | 302419 | GCGGGCGAGTTTGACGAGG       | CCCAAGGAGCACCAGATTGTGTG  | -3.06 | 112.5          |
| Zinc carboxypeptidase A1             | 301733 | CGCACATTCATCAACGGCAACA    | CCTCTTTGACCTGGGCGTTGG    | -3.26 | 102.4          |
| FAD-monooxygenase                    | 32449  | GCTGATAAGTTTCCACGATAACC   | AAATCTGTATATCCTTCCCGCT   | -3.33 | 99.5           |
| Pneumocandin biosynthesis protein    | 51260  | CTCAATGGCTTGTCAGATTCGT    | AGACTGTTGAAGAATACACCCTG  | -3.53 | 92.1           |
| $\alpha$ -1,3 glucanase              | 81097  | CATTTTCATGATCGGCATTGTTGG  | GCGTATTGAGCAATCTTCTGG    | -3.37 | 98.0           |
| $\alpha$ -acetolactate decarboxylase | 48180  | GCCACGGGAACCACGGCCT       | GACGGAGGGCTGGAAGGAGGT    | -3.17 | 107.0          |
| Aorsin serine proteinase             | 145909 | CTATCTCGAGCGCCAATGTG      | GTACTGGCTTGGTAGCTTGG     | -3.31 | 100.3          |
| MFS transporter                      | 41962  | CAAAGTTCTCAACTGCGTCCT     | GATGACGAAGACGATGAAGCC    | -3.55 | 91.39          |
| Phosphatidylserine decarboxylase     | 146755 | AATCTTGGGACGACTTCTTTACAC  | AATGCCTGATAAACTGTTGCTCC  | -3.48 | 94.0           |
| Actin                                |        | ATCGGTATGGGTCAGAAGGA      | ATGTCAACACGAGCAATGG      | -3.46 | 94.6           |

**TABLE S2.** Functional distribution and hit description of the 143 differentially expressed genes during the overgrowth of *Trichoderma atroviride* T11 on *Verticillium dahliae* V-138I

| Functional distribution | JGI ID  | Hit Description                                                   | E-value            |
|-------------------------|---------|-------------------------------------------------------------------|--------------------|
| <b>METABOLISM</b>       |         |                                                                   |                    |
| Carbohydrate            | 32968   | Thaumatococcus, pathogenesis-related                              | 0.0                |
|                         | 33348   | Endo- $\beta$ -1,3-glucanase                                      | 4e <sup>-122</sup> |
|                         | 37969   | Endo- $\beta$ -1,3-glucanase                                      | 3e <sup>-168</sup> |
|                         | 41194   | Endo- $\beta$ -1,3-glucanase                                      | 0.0                |
|                         | 46148   | Six-hairpin glycosidase                                           | 1e <sup>-143</sup> |
|                         | 48371   | Exo- $\beta$ -1,3-glucanase                                       | 1e <sup>-131</sup> |
|                         | 52592   | Chitinase                                                         | 5e <sup>-82</sup>  |
|                         | 54743   | Exo- $\beta$ -1,3-glucanase                                       | 4e <sup>-56</sup>  |
|                         | 217415  | Glycoside hydrolase family 18                                     | 0.0                |
|                         | 224184  | Thaumatococcus-like protein                                       | 5e <sup>-23</sup>  |
|                         | 161159* | $\beta$ -xylosidase                                               | 0.0                |
|                         | 42346   | Carbohydrate esterase family 1 protein                            | 0.0                |
|                         | 79361   | Carbohydratase-esterase family 9 protein                          | 0.0                |
|                         | 302304  | Cutinase                                                          | 1e <sup>-127</sup> |
|                         | 82388   | Chain A, crystal structure of endo- $\beta$ -1,4 glucuronan lyase | 4e <sup>-125</sup> |

|                      |         |                                               |                    |
|----------------------|---------|-----------------------------------------------|--------------------|
|                      | 77441   | Glycosyltransferase                           | 0.0                |
|                      | 184052  | Glycosyltransferase                           | 4e <sup>-165</sup> |
|                      | 288740  | Glycosyltransferase                           | 2e <sup>-170</sup> |
|                      | 224400* | Glycogen debranching enzyme                   | 0.0                |
|                      | 37996   | Short chain dehydrogenase/reductase           | 9e <sup>-57</sup>  |
|                      | 90220   | Dehydrogenase                                 | 1e <sup>-106</sup> |
|                      | 217448  | Short chain dehydrogenase/reductase           | 1e <sup>-111</sup> |
|                      | 275833  | Short chain dehydrogenase/reductase           | 5e <sup>-69</sup>  |
| Lipid and fatty acid | 43454   | Thioesterase superfamily protein              | 1e <sup>-30</sup>  |
|                      | 282317  | Acyl-CoA thioesterase 2                       | 2e <sup>-126</sup> |
|                      | 322224  | 1 H-3-hydroxy-4-oxoquinaldine 2,4-dioxygenase | 4e <sup>-67</sup>  |
|                      | 90126   | AMP-dependent CoA ligase                      | 0.0                |
|                      | 229608  | Long-chain-fatty-acid-CoA ligase              | 1e <sup>-167</sup> |
|                      | 43297   | Enoyl-CoA hydratase/isomerase                 | 2e <sup>-144</sup> |
|                      | 39628   | Glycerol kinase                               | 0.0                |
|                      | 140671* | Methyltransferase type 11                     | 0.0                |
| Protein              | 36337   | Deuterolysin metallopeptidase                 | 3e <sup>-92</sup>  |
|                      | 54382   | Dipeptidyl-peptidase                          | 1e <sup>-147</sup> |
|                      | 168477  | Metallopeptidase                              | 2e <sup>-91</sup>  |
|                      | 179435  | Metalloprotease                               | 0.0                |
|                      | 227276  | Subtilisin protease                           | 0.0                |

|              |        |                                                    |             |
|--------------|--------|----------------------------------------------------|-------------|
|              | 288311 | Subtilisin protease                                | 0.0         |
|              | 292296 | Aspartic endopeptidase                             | 0.0         |
|              | 299629 | Fungalsin metalloproteinase                        | 0.0         |
|              | 301733 | Zinc carboxypeptidase A1                           | 0.0         |
|              | 302419 | Alkaline proteinase                                | 0.0         |
| Amino acid   | 30776  | D-amino acid aminotransferase                      | $5e^{-145}$ |
|              | 93352  | Cysteine synthase                                  | 0.0         |
|              | 52932  | AMP-binding enzyme                                 | 0.0         |
|              | 260926 | Homoserine o-acetyltransferase                     | $1e^{-167}$ |
| Nucleic acid | 35700  | Bacterial-type extracellular deoxyribonuclease     | $5e^{-80}$  |
|              | 314350 | Dihydrofolate reductase                            | $3e^{-117}$ |
| Secondary    | 42070  | Isoamyl alcohol oxidase                            | $5e^{-151}$ |
|              | 43092  | Oxidoreductase (related to flavine oxidoreductase) | $3e^{-148}$ |
|              | 43714  | Manitol dehydrogenase                              | $3e^{-134}$ |
|              | 48755  | Indoleamine 2,3-dioxygenase                        | 0.0         |
|              | 84122  | L-aminoadipate-semialdehyde dehydrogenase          | $1e^{-168}$ |
|              | 210776 | Polyamine oxidase                                  | 0.0         |

|        |         |                                                         |             |
|--------|---------|---------------------------------------------------------|-------------|
|        | 314346  | Lactate dehydrogenase                                   | $7e^{-171}$ |
|        | 45759*  | Clavamate synthase                                      | $2e^{-166}$ |
|        | 280794* | Chloroperoxidase                                        | $7e^{-58}$  |
|        | 32458   | Polyketide synthase                                     | 0.0         |
|        | 211357  | Polyketide synthase                                     | 0.0         |
|        | 156569  | Nonribosomal peptide synthetase                         | 0.0         |
|        | 32449   | FAD-monooxygenase                                       | 0.0         |
|        | 52551   | L-lysine 6-monooxygenase/L-ornithine 5-monooxygenase    | $8e^{-153}$ |
|        | 250440  | Cyclohexanone monooxygenase                             | $2e^{-142}$ |
|        | 42245   | Ubi A prenyltransferase                                 | $5e^{-88}$  |
|        | 295847  | Prenyltransferase                                       | $1e^{-49}$  |
|        | 37750   | Trichothecene C-15 hydroxylase                          | $4e^{-122}$ |
|        | 43598   | Cytochrome P450                                         | 0.0         |
|        | 84128   | Cytochrome P450 monooxygenase                           | 0.0         |
|        | 295844  | Cytochrome P450 monooxygenase                           | 0.0         |
|        | 90918   | Zn-dependent hydrolase/oxydoreductase family            | 0.0         |
| Energy | 46393   | Dehydrogenase                                           | $2e^{-103}$ |
|        | 53082   | NADP-dependent leukotriene b4 12-hydroxydehydrogenase   | $1e^{-179}$ |
|        | 162830  | $\alpha$ -ketoglutarate-dependent sulfonate dioxygenase | 0.0         |
|        | 239450  | NAD(P)-binding                                          | $4e^{-77}$  |

|         |                         |            |
|---------|-------------------------|------------|
| 221344  | Haloacid dehydrogenase  | $7e^{-73}$ |
| 288362* | Phosphoglycerate mutase | $4e^{-89}$ |

## CELLULAR PROCESSES AND SIGNALING

|           |        |                                           |             |
|-----------|--------|-------------------------------------------|-------------|
| Transport | 129432 | Oligopeptide transporter                  | 0.0         |
|           | 232557 | Oligopeptide transporter                  | 0.0         |
|           | 53012  | MSF transporter                           | 0.0         |
|           | 81541  | Efflux pump antibiotic resistance protein | 0.0         |
|           | 84436  | Rivoflavin transporter                    | $6e^{-151}$ |
|           | 262763 | Flavin-nucleotide binding                 | $1e^{-118}$ |
|           | 251581 | Tetracycline resistance protein           | $5e^{-132}$ |
|           | 280284 | MSF transporter                           | $3e^{-31}$  |
|           | 229348 | Cytosine-purine permease                  | 0.0         |
|           | 139683 | Globin-like-protein                       | $4e^{-133}$ |
|           | 284539 | Cobalamin (Vitamin B12) domain            | 0.0         |
|           | 81501  | Transmembrane aminoacid transporter       | 0.0         |
|           | 296589 | Dicarboxylic amino acid permease          | 0.0         |

|                                     |                  |                                                 |             |
|-------------------------------------|------------------|-------------------------------------------------|-------------|
|                                     | 290277           | GPR1 family protein                             | $7e^{-71}$  |
| Defense                             | 299986           | Heat shock protein (hsp23)                      | $2e^{-75}$  |
|                                     | 301737           | Heat shock protein (hsp20)                      | $3e^{-120}$ |
|                                     | 85009            | Mss4-like protein                               | $2e^{-60}$  |
|                                     | 77850            | Gluthatione S-transferase                       | $2e^{-79}$  |
|                                     | 142741           | Glycolate oxidase                               | 0.0         |
|                                     | 37150            | Acetyltransferase                               | $4e^{-128}$ |
| Signaling                           | 290919           | Small secreted cysteine-rich protein            | 0.0         |
|                                     | 298730           | Small secreted cysteine-rich protein            | 0.0         |
|                                     | TriviG29_70385** | Small secreted cysteine rich protein            | 0.0         |
|                                     | 283740*          | Small secreted cysteine-rich protein            | 0.0         |
|                                     | 300292*          | GPR1 family                                     | $3e^{-144}$ |
| Cell-cell contact and communication | 239712           | Phosphatidylinositide-specific phospholipases C | 0.0         |
|                                     | 294485*          | Rearrangement hotspot protein                   | 0.0         |
| Detoxification                      | 269934           | Tol protein                                     | $3e^{-42}$  |
|                                     | 278807           | Tat pathway signal sequence                     | $2e^{-37}$  |
| Cell wall and membrane              | 46317            | PTH-11 integral membrane                        | $3e^{-96}$  |
|                                     | 81348            | Expansin module family                          | $3e^{-76}$  |
| Regulation                          | 41299            | Related to cercosporin resistance               | $2e^{-145}$ |
|                                     | 164928           | Homeobox transcription factor                   | $2e^{-82}$  |

|                                           |        |                                               |            |
|-------------------------------------------|--------|-----------------------------------------------|------------|
|                                           | 301901 | STF2 protein                                  | $3e^{-41}$ |
| Postranslation events                     | 256937 | Isoflavone reductase-like protein             | $7e^{-66}$ |
|                                           | 302964 | NmrA-like family protein                      | $4e^{-27}$ |
|                                           | 88236  | NmrA-like family protein                      | $6e^{-80}$ |
| <b>INFORMATION STORAGE AND PROCESSING</b> |        |                                               |            |
| Transcription                             | 90244  | Methyltransferase                             | $4e^{-58}$ |
| Translation                               | 131910 | Valyl-tRNA synthetase mitochondrial precursor | 0.0        |
|                                           | 246441 | Amidase                                       | 0.0        |

---

\*: down-regulated genes

\*\*: gene identified from probe designed against *T. virens* genome



**TABLE S3.** Functional assignation of 18 differentially expressed genes [Fold-change (FC) > 2, FDR < 0.15,  $P < 0.05$ ] occurring only between *Trichoderma atroviride* T11 overgrowing *Verticillium dahliae* V-138I and T11 grown alone

| Functional distribution                     | Hit description<br>(E-value < $10^{-20}$ limit) | Lg <sub>2</sub><br>FC | JGI ID |
|---------------------------------------------|-------------------------------------------------|-----------------------|--------|
| <b>METABOLISM</b>                           |                                                 |                       |        |
| Carbohydrates                               | Short-chain dehydrogenase/reductase             | 4.69                  | 306768 |
|                                             | β-1,3-glucanase                                 | 2.44                  | 315637 |
|                                             | α-1,3-glucanase                                 | 2.02                  | 81097  |
| Secondary                                   | Taurine catabolism monooxygenase                | -2.43                 | 46162  |
|                                             | Tyrosine metabolic process                      | -2.35                 | 63940  |
|                                             | Pneumocandin biosynthesis                       | 2.12                  | 51260  |
|                                             | Cytochrome P450 monooxygenase                   | 2.08                  | 263459 |
| <b>CELLULAR PROCESSES<br/>AND SIGNALING</b> |                                                 |                       |        |
| Transport                                   | MFS transporter                                 | 2.38                  | 30874  |
|                                             | Purine permease                                 | 2.25                  | 42539  |

|                  |                                           |       |        |
|------------------|-------------------------------------------|-------|--------|
|                  | Allantoate permease                       | 2.23  | 46082  |
| Defense          | Heat-shock protein 78                     | 2.17  | 157172 |
| Signaling        | G-protein-coupled receptor                | 2.08  | 130836 |
| Detoxification   | Cytochrome oxidase assembly protein       | 4.44  | 84409  |
| Regulation       | Fungal transcriptional regulatory protein | 2.07  | 321925 |
| Adhesion         | Fibronectin                               | -2.64 | 299265 |
| UNKNOWN FUNCTION |                                           |       |        |
|                  | -                                         | 2.10  | 171019 |
|                  | -                                         | 2.01  | 302901 |
|                  | -                                         | -2.01 | 300321 |

---

\*Identification (ID) in the *T. atroviride* genome [Joint Genome Institute (JGI)].

**TABLE S4.** Functional assignation of 18 differentially expressed genes [Fold-change (FC) > 2, FDR < 0.15,  $P < 0.05$ ] occurring only between *Trichoderma atroviride* T11 overgrowing *Verticillium dahliae* V-138I and T11 at ca 5 mm of V-138I

| Functional distribution                     | Hit description<br>(E-value < $10^{-20}$ limit) | Lg <sub>2</sub><br>FC | JGI ID* |
|---------------------------------------------|-------------------------------------------------|-----------------------|---------|
| <b>METABOLISM</b>                           |                                                 |                       |         |
| Carbohydrates                               | $\alpha$ -acetolactate decarboxylase            | 2.16                  | 48180   |
|                                             | Aorsin (serine proteinase)                      | 2.10                  | 145909  |
| Lipids                                      | Phosphatidylserine decarboxylase                | 2.11                  | 146755  |
|                                             | 3- $\beta$ -hydroxysteroid dehydrogenase        | 2.01                  | 214542  |
| Nitrogen                                    | NAD(P)H Azoreductase                            | 2.43                  | 297537  |
| Secondary                                   | Chanoclavine synthase                           | -2.04                 | 152289  |
| <b>CELLULAR PROCESSES<br/>AND SIGNALING</b> |                                                 |                       |         |
| Transport                                   | MFS transporter                                 | -2.97                 | 41962   |
|                                             | MFS transporter                                 | -2.85                 | 42539   |
|                                             | Monocarboxylate transporter                     | 2.29                  | 296804  |

|                  |                                                         |       |        |
|------------------|---------------------------------------------------------|-------|--------|
|                  | Fe/Mn superoxide transporter                            | 2.12  | 48025  |
| Signaling        | Ankyrin repeat protein                                  | 2.34  | 181516 |
| Adhesion         | Protein with von Willebrand factor A (VWA)-like modules | 2.11  | 213544 |
| UNKNOWN FUNCTION |                                                         |       |        |
|                  | -                                                       | -2.87 | 77767  |
|                  | -                                                       | -2.29 | 297301 |
|                  | -                                                       | 2.17  | 49033  |
|                  | -                                                       | 2.10  | 35776  |
|                  | -                                                       | 2.03  | 185735 |
|                  | -                                                       | 2.02  | 49033  |

---

\*Identification (ID) in the *T. atroviride* genome [Joint Genome Institute (JGI)].
